# Supplementary material for: Ginsenoside-Rg1 synergized with voluntary running exercise protects against glial activation and dysregulation of neuronal plasticity in depression
Source: Royal Society of Chemistry journal article supplement (doi:10.1039/d3fo00496a), 2023-01-01

**Figure 4A**

**anti-CD45**

CD45

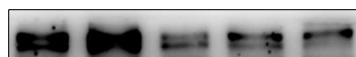

Control  
LPS  
Run + LPS  
G-Rg1 + LPS  
Run + G-Rg1 + LPS

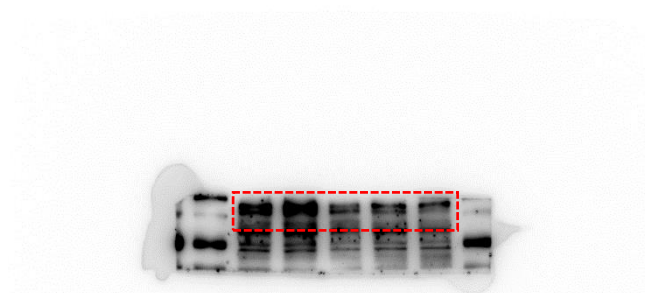

**anti- $\beta$ -actin**

$\beta$ -actin

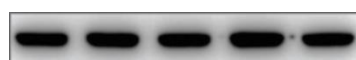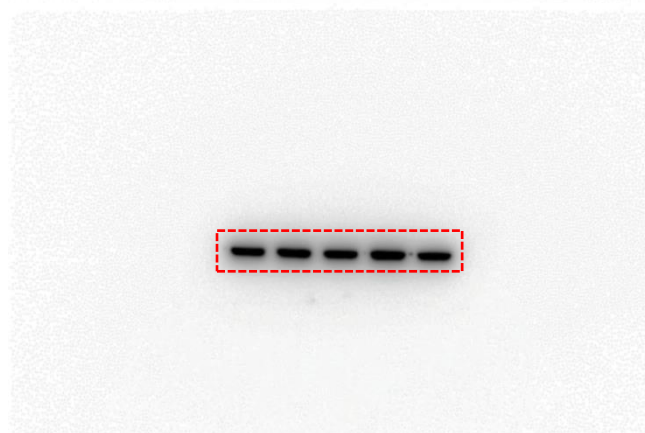

**anti-CD11b**

CD11b

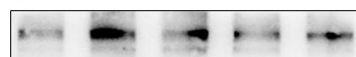

Control  
LPS  
Run + LPS  
G-Rg1 + LPS  
Run + G-Rg1 + LPS

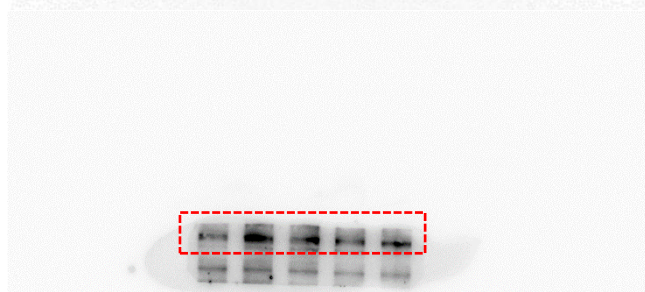

**anti- $\beta$ -actin**

$\beta$ -actin

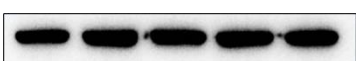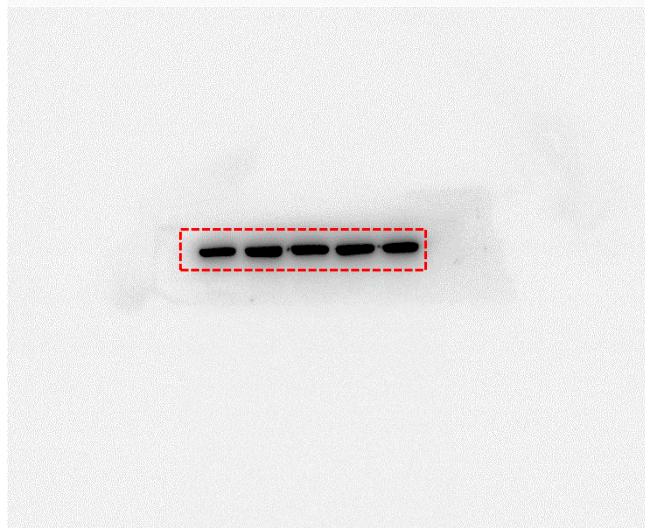

anti-IL-1 $\beta$

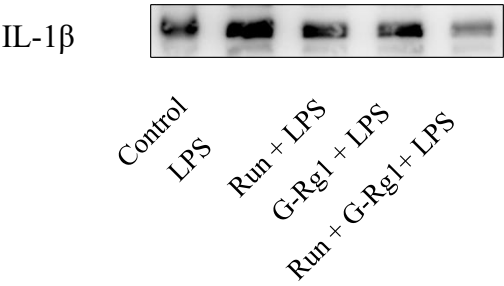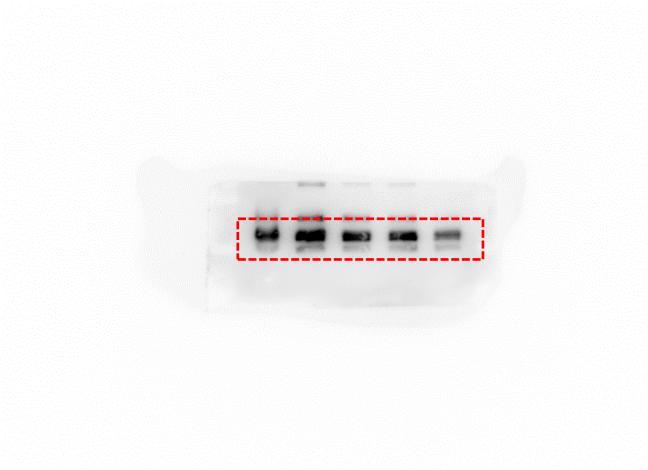

anti- $\beta$ -actin

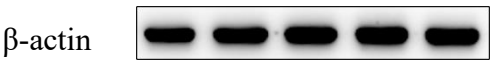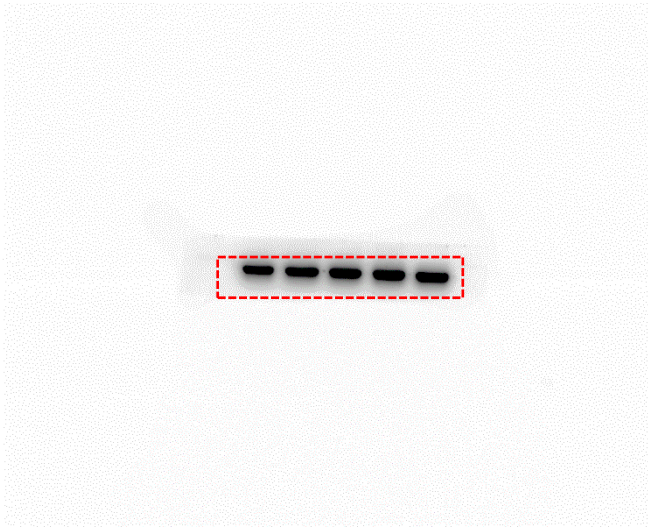

Figure 4B

anti-CD45

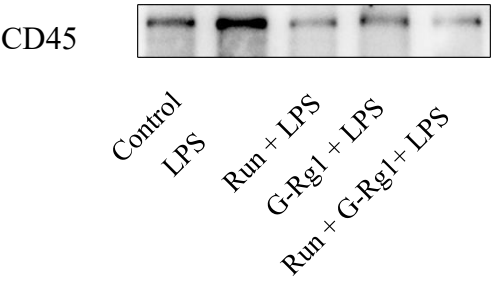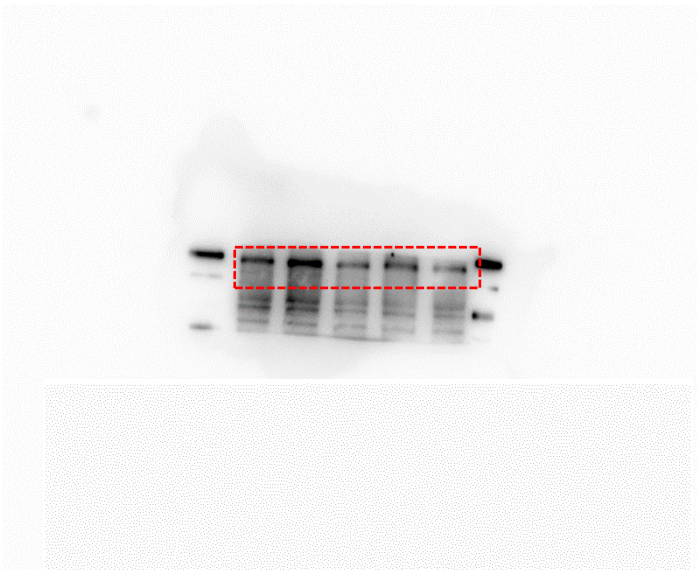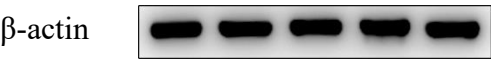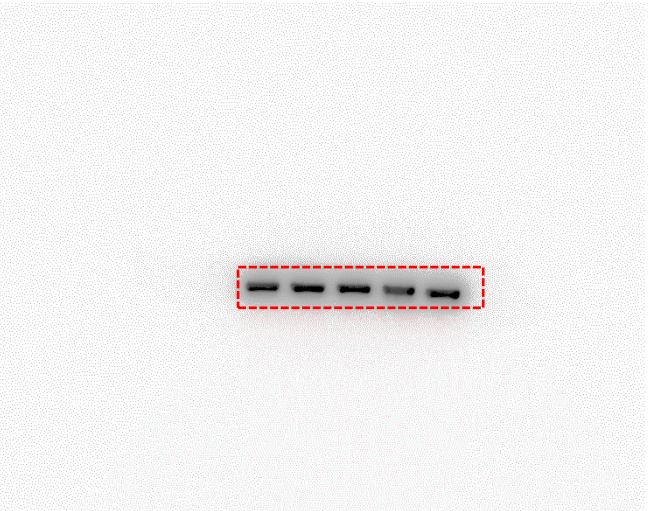



anti-CD11b

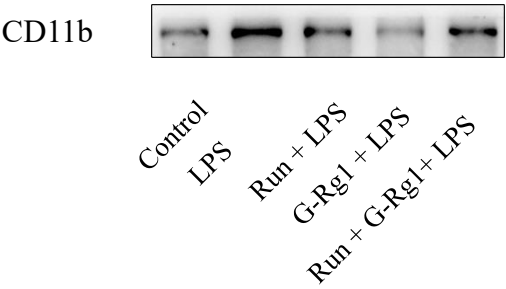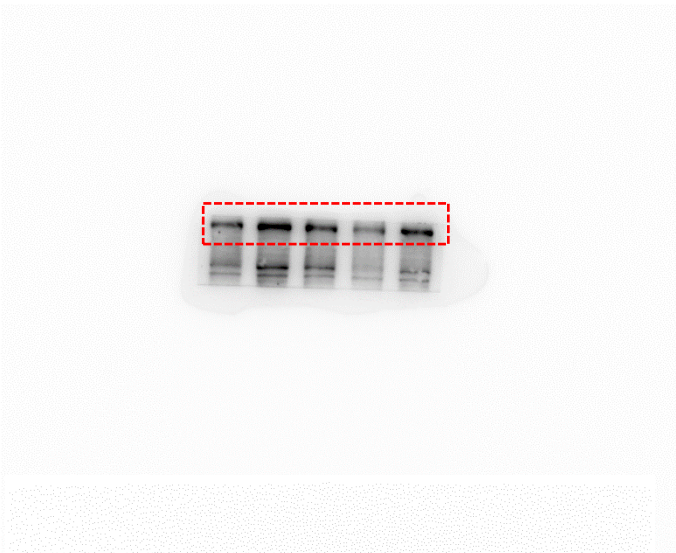

anti-β-actin

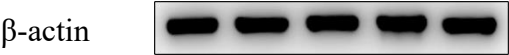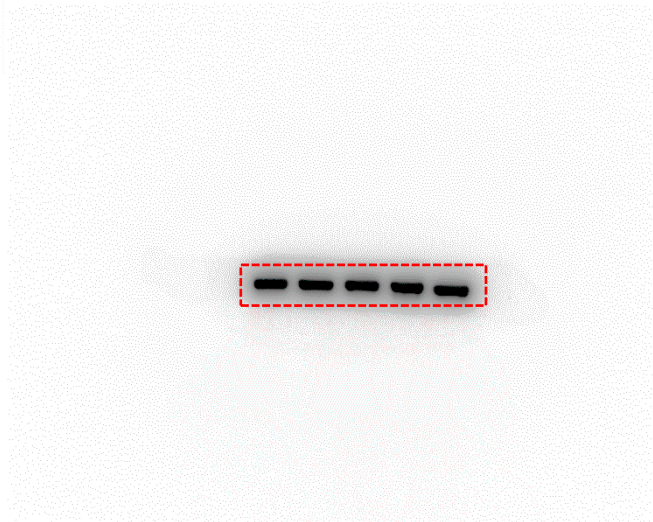

anti-IL-1β

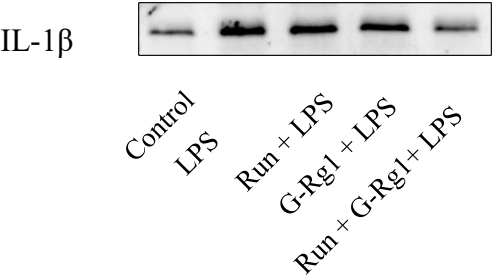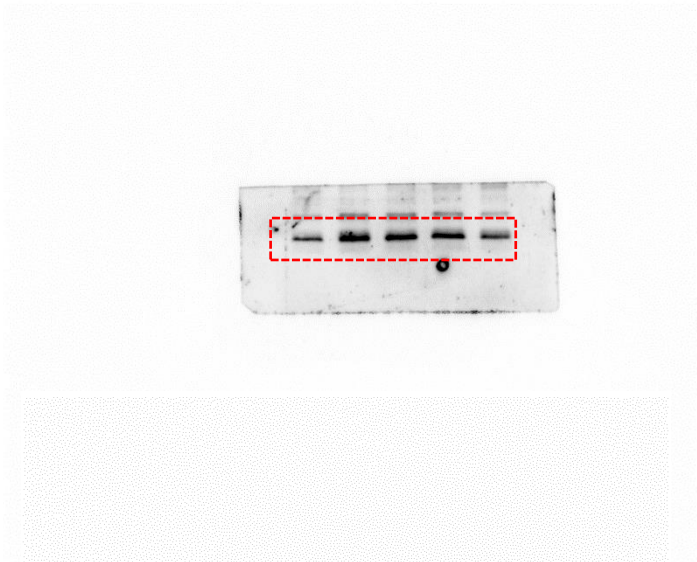

anti-β-actin

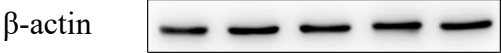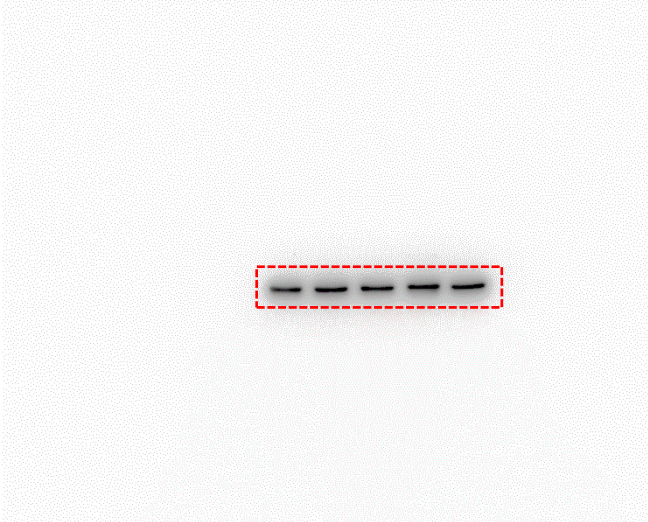

**Figure 5A**

**anti-p-CREB**

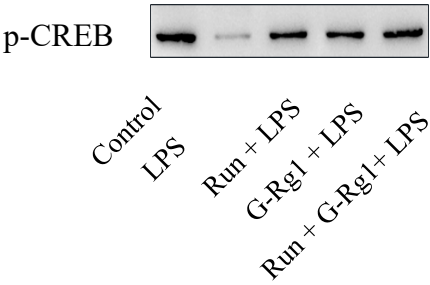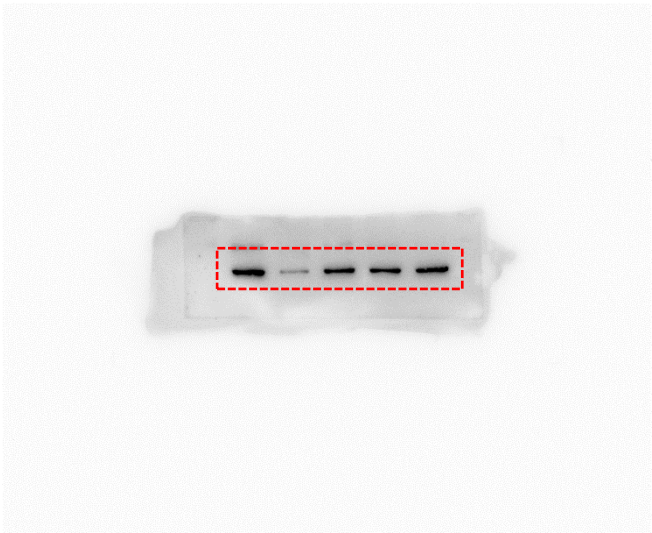

**anti-β-actin**

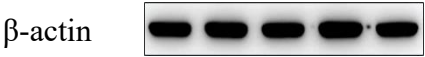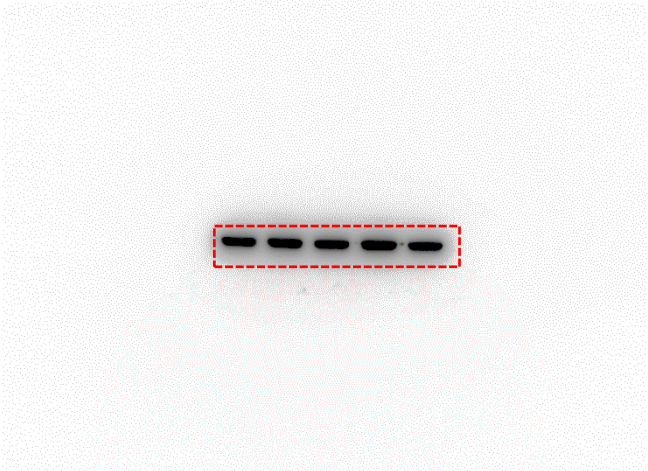

**anti-BDNF**

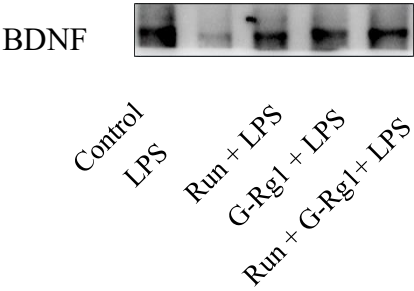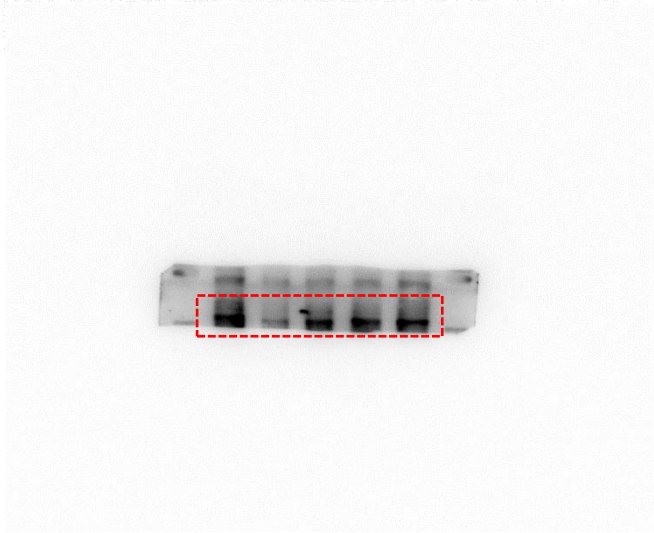

**anti-GAPDH**

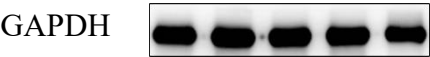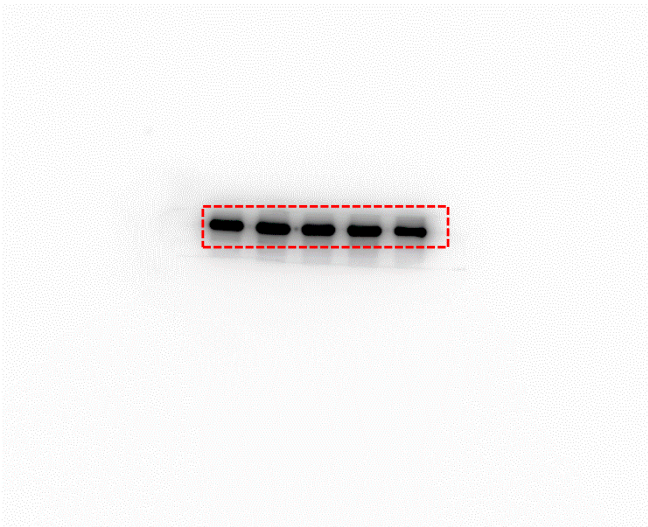



Figure 6A

anti-p-CREB

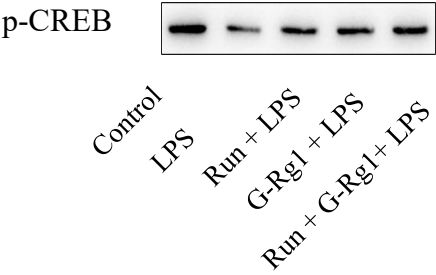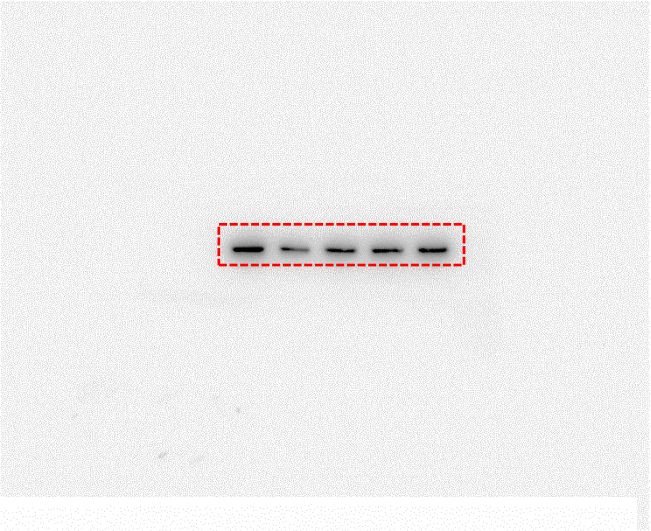

anti-β-actin

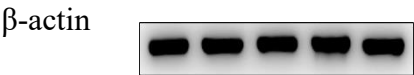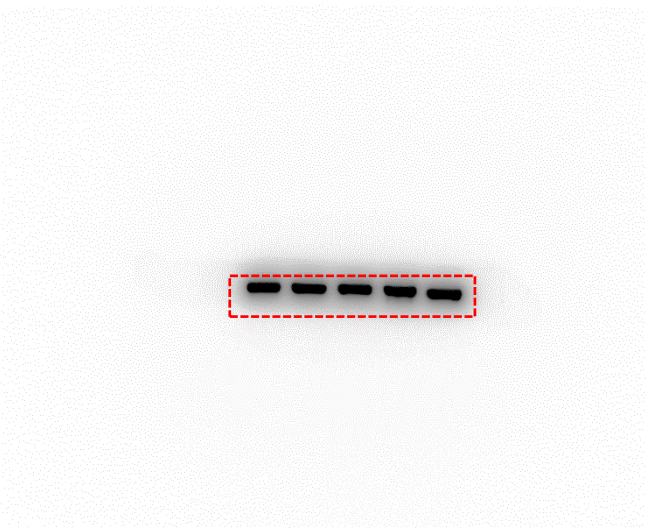

anti-BDNF

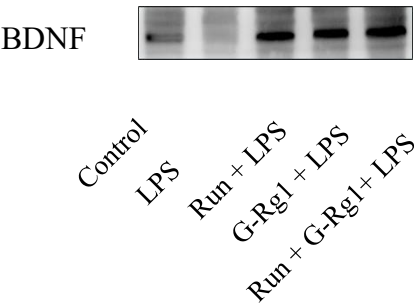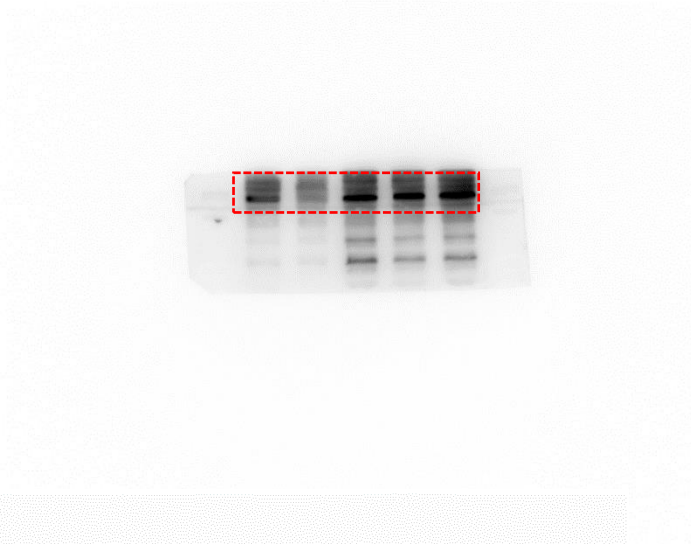

anti-GAPDH

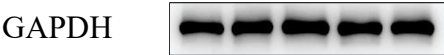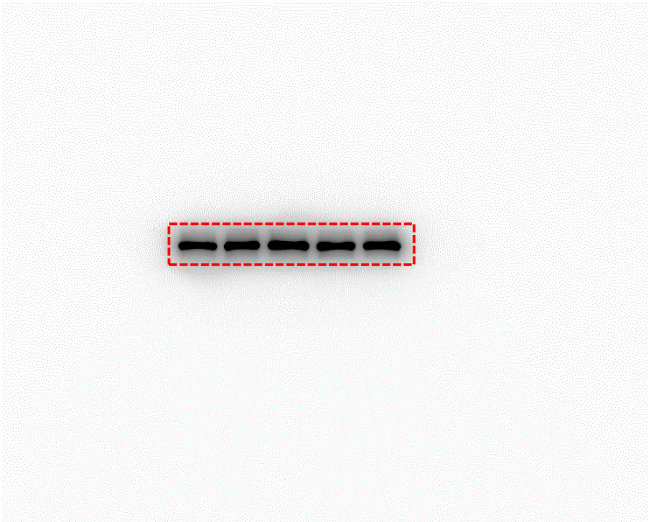

Figure7A

anti-SYT1

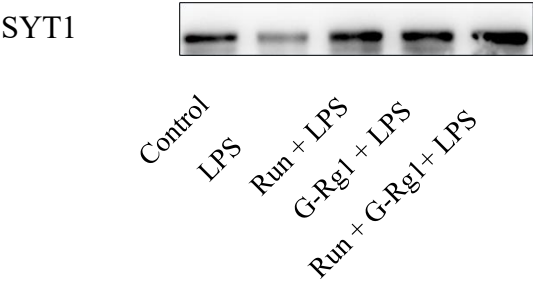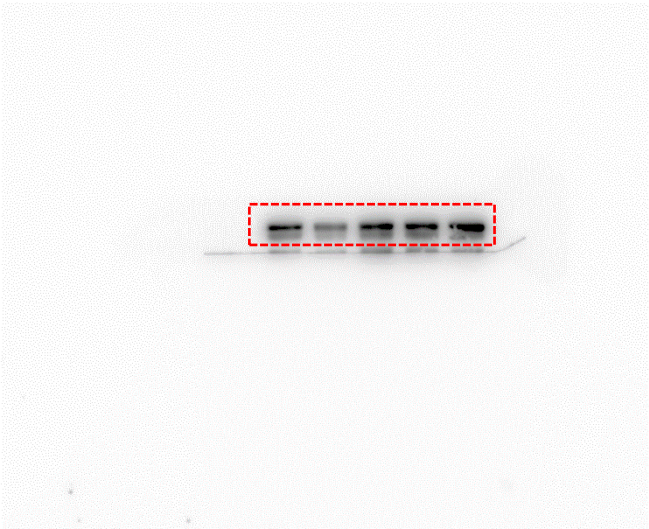

anti-β-actin

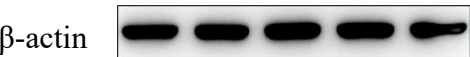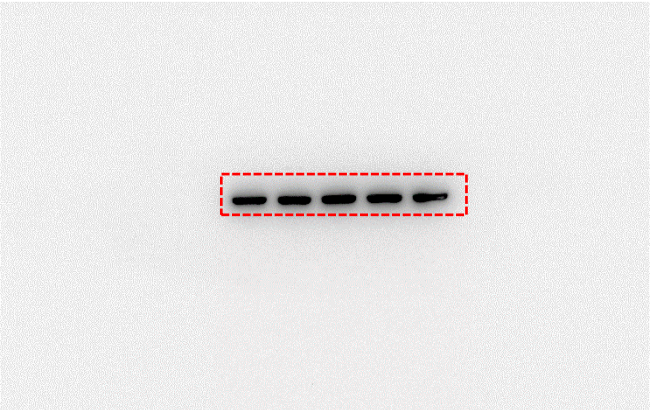

anti-PDS-95

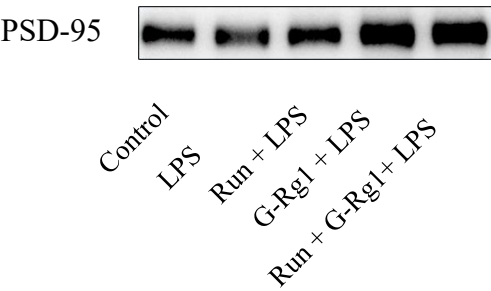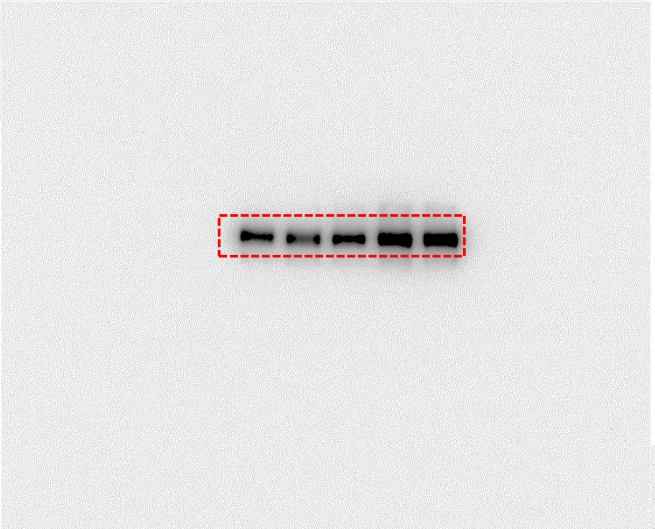

anti-β-actin

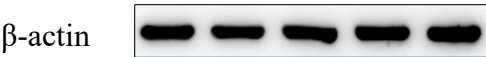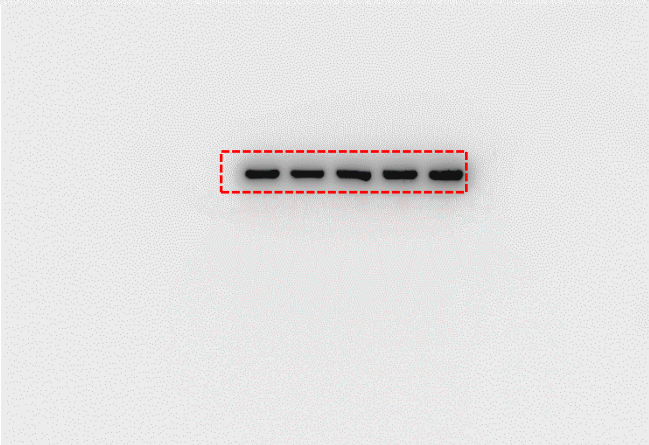



Figure8A

anti-SYT1

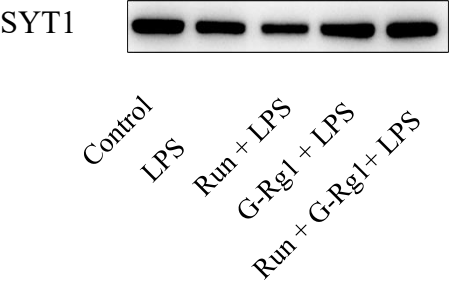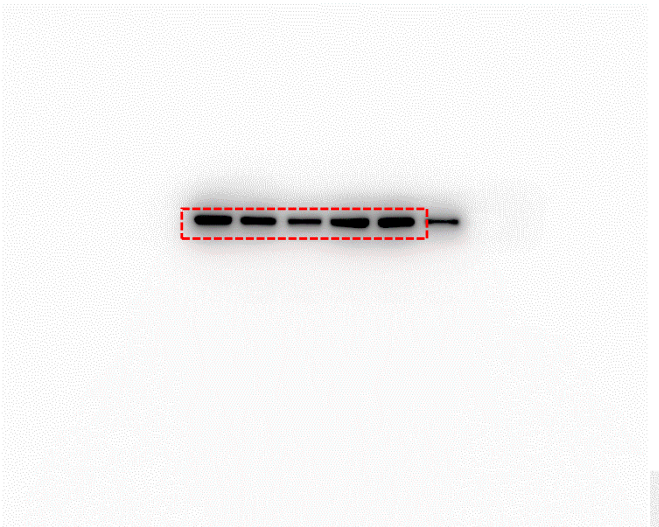

anti-β-actin

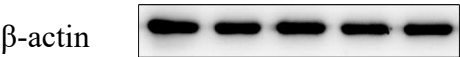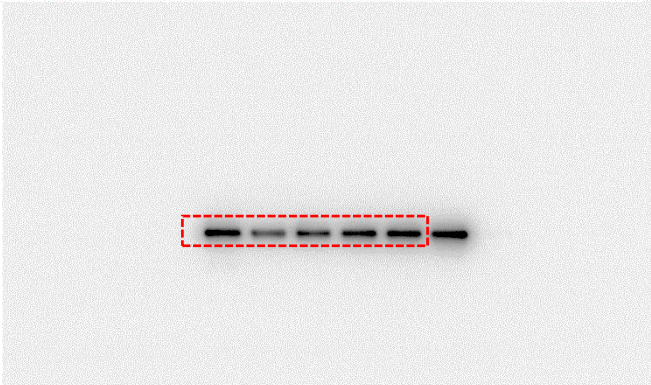

anti-PDS-95

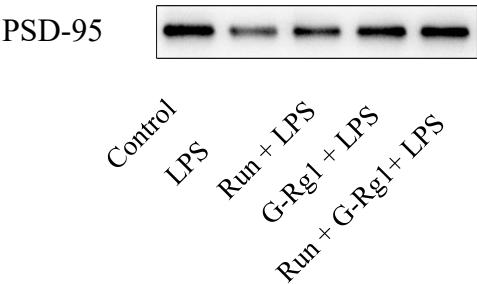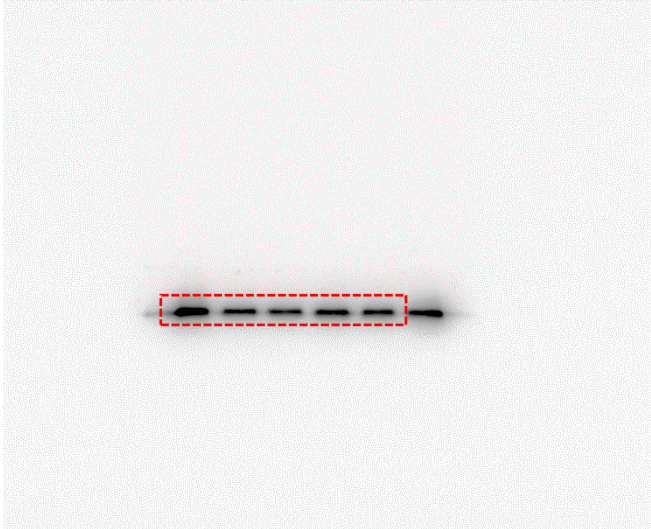

anti-β-actin

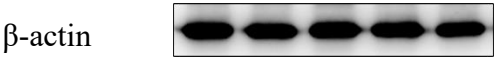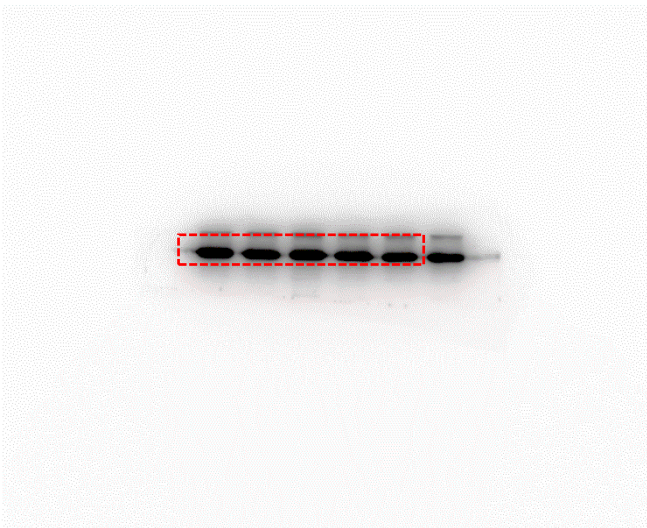

Supplement: d3fo00496a2.pdf [file d3fo00496a2.pdf]
